# Supplementary material for: Influence of Sexually Transmitted Infections in Pregnant Adolescents on Preterm Birth and Chorioamnionitis
Source: Hindawi journal article supplement (doi:10.1155/2020/1908392), 2020-03-25
Supplement: f1 [file 1908392.f1.pdf]

## Supplementary Tables

**Manuscript Title:** Influence of sexually transmitted infections in pregnant adolescents on preterm delivery and chorioamnionitis

**Authors:** Esther Fuchs, MD; Maggie Dwiggin, MD, Erica M Lokken MS, PhD; Jennifer A Unger, MD, MPH; Linda O Eckert, MD

**Supplementary Table 1. Demographic and reproductive history characteristics, STI diagnosis, and pregnancy outcomes for 739 study participants – By County Type**

| Characteristic*                               | Total<br>N | Primary Catchment<br>Counties<br>(n=606) | Referral<br>Counties<br>(n=133) | p-<br>value |
|-----------------------------------------------|------------|------------------------------------------|---------------------------------|-------------|
| <b><i>Demographic</i></b>                     |            |                                          |                                 |             |
| Age (Median)                                  | 739        | 18 (17-19)                               | 18 (17-19)                      | 0.45        |
| Age                                           | 739        |                                          |                                 | 0.75        |
| 13-15                                         |            | 30 (5.0)                                 | 6 (4.5)                         |             |
| 16-17                                         |            | 159 (26.2)                               | 31 (23.3)                       |             |
| 18-19                                         |            | 417 (68.8)                               | 96 (72.2)                       |             |
| Marital status                                | 738        |                                          |                                 | 0.11        |
| Single                                        |            | 556 (91.8)                               | 115 (87.1)                      |             |
| Married                                       |            | 46 (7.6)                                 | 14 (10.6)                       |             |
| Divorced/separated                            |            | 4 (0.7)                                  | 3 (2.3)                         |             |
| Race                                          | 737        |                                          |                                 | <0.001      |
| White                                         |            | 303 (50.2)                               | 108 (81.2)                      |             |
| Black                                         |            | 252 (41.7)                               | 16 (12.0)                       |             |
| Other†                                        |            | 49 (8.1)                                 | 9 (6.8)                         |             |
| Smoking status                                | 727        |                                          |                                 | <0.01       |
| Never                                         |            | 350 (58.2)                               | 59 (46.8)                       |             |
| Ever‡                                         |            | 97 (16.1)                                | 18 (14.3)                       |             |
| Yes                                           |            | 154 (25.6)                               | 49 (38.9)                       |             |
| <b><i>Reproductive History</i></b>            |            |                                          |                                 |             |
| Gravidity                                     | 739        | 1 (1,1)                                  | 1 (1,1)                         | 0.33        |
| Parity                                        | 739        | 0 (1,1)                                  | 0 (0,1)                         | 0.45        |
| <b><i>Sexually Transmitted Infections</i></b> |            |                                          |                                 |             |
| Any STI                                       | 739        | 108 (17.8)                               | 14 (10.5)                       | 0.04        |
| <i>N. gonorrhoeae</i>                         | 739        | 20 (3.3)                                 | 3 (2.2)                         | 0.53        |
| <i>C. trachomatis</i>                         | 739        | 87 (14.4)                                | 10 (7.5)                        | 0.03        |
| <i>T. vaginalis</i>                           | 739        | 23 (3.8)                                 | 4 (3.0)                         | 0.66        |
| <b><i>Pregnancy Outcomes</i></b>              |            |                                          |                                 |             |
| Pre-eclampsia                                 | 739        | 30 (5.0)                                 | 15 (11.3)                       | <0.01       |
| Cesarean section                              | 737        | 147 (24.3)                               | 38 (28.8)                       | 0.28        |
| Gestational age at delivery                   | 739        |                                          |                                 | <0.001      |
| <34 weeks                                     |            | 40 (6.6)                                 | 34 (25.6)                       |             |
| 34-36 weeks                                   |            | 51 (8.4)                                 | 14 (10.5)                       |             |
| 37-38 weeks                                   |            | 138 (22.8)                               | 40 (30.1)                       |             |

|                                         |     |            |           |        |
|-----------------------------------------|-----|------------|-----------|--------|
| ≥39 weeks                               |     | 377 (62.2) | 45 (33.8) |        |
| Preterm birth                           | 739 | 91 (15.0)  | 48 (36.1) | <0.001 |
| Any Chorioamnionitis                    | 738 | 95 (15.7)  | 17 (12.8) | 0.40   |
| Clinical Chorioamnionitis               | 708 | 21 (3.6)   | 1 (0.8)   | 0.09   |
| Chorioamnionitis by Placental Pathology | 381 | 85 (28.5)  | 16 (19.3) | 0.09   |

---

**Supplementary Table 2. Associations between sexually transmitted infections and preterm birth and chorioamnionitis – Primary Catchment Counties Only**

| Diagnosed STI                | Preterm Birth          |                        |                           |              |                                      | Any Chorioamnionitis |                        |                        |                           |              |                         |              |
|------------------------------|------------------------|------------------------|---------------------------|--------------|--------------------------------------|----------------------|------------------------|------------------------|---------------------------|--------------|-------------------------|--------------|
|                              | Yes<br>(N=91)<br>n (%) | No<br>(N=515)<br>n (%) | Unadjusted PR<br>(95% CI) |              | Adjusted PR <sub>s</sub><br>(95% CI) |                      | Yes<br>(N=95)<br>n (%) | No<br>(N=510)<br>n (%) | Unadjusted PR<br>(95% CI) |              | Adjusted PR<br>(95% CI) |              |
| <b>Any STI</b>               | 18 (19.8)              | 90 (17.5)              | 1.14                      | (0.71, 1.82) | 1.13                                 | (0.71, 1.81)         | 21 (22.1)              | 87 (17.1)              | 1.31                      | (0.84, 2.02) | 1.31                    | (0.85, 2.02) |
| <b><i>N. gonorrhoeae</i></b> | 0 (0.0)                | 20 (3.9)               | -                         | -            | -                                    | -                    | 3 (3.2)                | 17 (3.3)               | 0.95                      | (0.33, 2.76) | 0.93                    | (0.33, 2.64) |
| <b><i>C. trachomatis</i></b> | 16 (17.6)              | 71 (13.8)              | 1.27                      | (0.78, 2.08) | 1.27                                 | (0.78, 2.08)         | 16 (16.8)              | 71 (13.9)              | 1.21                      | (0.74, 1.96) | 1.22                    | (0.75, 1.99) |
| <b><i>T. vaginalis</i></b>   | 5 (5.5)                | 18 (3.8)               | 1.47                      | (0.66, 3.28) | 1.37                                 | (0.64, 2.93)         | 8 (8.4)                | 15 (2.9)               | 2.33                      | (1.29, 4.21) | 2.19                    | (1.22, 3.92) |

\* Results reported as n(%) or median (inter-quartile range)

† Including participants identifying as Asian, American Indian, American Native, multiracial, or other

‡ Including participants reporting quitting or no smoking during this pregnancy

Abbreviation: STI-sexually transmitted infection

§ Adjusted *a priori* for age, race, and smoking status
